# Supplementary material
Source: publisher figshare collection journal article supplement (https://sage.figshare.com/ndownloader/files/13078301)
Supplement: Supplementary file 1 [file 13078301]

## ACC Robustness Session

|                                                                                                                                                                                                                                                                                                                                                                                                                                                                                                                               |                                                                                                                                                                                                                                                                                                                                                                                                                              |
|-------------------------------------------------------------------------------------------------------------------------------------------------------------------------------------------------------------------------------------------------------------------------------------------------------------------------------------------------------------------------------------------------------------------------------------------------------------------------------------------------------------------------------|------------------------------------------------------------------------------------------------------------------------------------------------------------------------------------------------------------------------------------------------------------------------------------------------------------------------------------------------------------------------------------------------------------------------------|
| <b>Exercise 1</b><br><b>Glute Wall Holds</b><br><b>Cue 1:</b> Posture - Reach head to ceiling stretching body upwards.<br><b>Cue 2:</b> Push wall away from you with knee (keeping hips facing forwards).<br><b>Cue 3:</b> Push out slightly with standing leg as if pushing carpet away from you.<br><b>Sets:</b> 2<br><b>Reps/ Time:</b> Start with 20s build up to 1 min<br>                                                              | <b>Exercise 2</b><br><b>Clams</b><br><b>Cue 1:</b> Start with Shoulders, Hips & Ankles in straight line.<br><b>Cue 2:</b> Lift top knee slowly keeping ankles fixed together.<br><b>Cue 3:</b> Keep hand on hip/ lower back to avoid any additional movement.<br><b>Sets:</b> 2<br><b>Reps/ Time:</b> Start with 20s build up to 1 min<br> |
| <b>Exercise 3</b><br><b>Squat to Box</b><br><b>Cue 1:</b> Sit back to a seat - hips before knees.<br><b>Cue 2:</b> "Show Your Badge" ensure mirror or partner can see what's on your shirt.<br><b>Cue 3:</b> "Separate the floor" push feet outwards gently.<br><b>Sets:</b> 2<br><b>Reps/ Time:</b> Build from 10-25 reps<br>                                                                                                               | <b>Exercise 4</b><br><b>SL Balance with Hip Flexions</b><br><b>Cue 1:</b> Reach up to ceiling stretching body tall.<br><b>Cue 2:</b> Keep hips level, slowly lift knee to parallel to floor and return without touching.<br><b>Cue 3:</b> Feel strong.<br><b>Sets:</b> 2<br><b>Reps/ Time:</b> Build from 10-30 reps<br>                   |
| <b>Exercise 5</b><br><b>Static Lunge</b><br><b>Cue 1:</b> Sit down through the middle of your feet.<br><b>Cue 2:</b> Stand tall and strong.<br><b>Cue 3:</b> Drive the floor away from you with front leg to return.<br><b>Sets:</b> 2<br><b>Reps/ Time:</b> Build from 10 to 20 reps.<br>                                                                                                                                                 | <b>Exercise 6</b><br><b>Double Leg Glute Bridge</b><br><b>Cue 1:</b> Squeeze glutes and lift hips from floor to level with shoulders and knees.<br><b>Cue 2:</b> Push down into floor with feet.<br><b>Cue 3:</b> Keep hips level and strong.<br><b>Sets:</b> 2<br><b>Reps/ Time:</b> Build from 12-30 reps<br>                          |
| <b>Exercise 7</b><br><b>Nordic Hamstrings</b><br><b>Cue 1:</b> Stay tall throughout movement.<br><b>Cue 2:</b> Keep distance between top of hips and bottom of ribs the same.<br><b>Cue 3:</b> Lower to maximal range, falling to floor when can no longer control.<br><b>Sets:</b> 2<br><b>Reps/ Time:</b> 4-10 reps<br>                                                                                                                  | <b>Exercise 8</b><br><b>Side Planks from Knees</b><br><b>Cue 1:</b> Push down into floor with elbow, lifting shoulders to ceiling.<br><b>Cue 2:</b> Keep head, shoulders, hips and knees in a straight line without rotating.<br><b>Cue 3:</b> Be as tall as possible.<br><b>Sets:</b> 2<br><b>Reps/ Time:</b> 30s to 1 minute<br>       |
| <b>Exercise 9</b><br><b>Y-Balance</b><br><b>Cue 1:</b> Reach out in each direction as far as possible.<br><b>Cue 2:</b> Bend at knee and hip to get as low as possible for each rep.<br><b>Cue 3:</b> Try not to put your foot down, gently touch floor at maximal reach.<br><b>Sets:</b> 2<br><b>Reps/ Time:</b> 3-6 reps (all 3 points is 1 rep)<br>  | <b>Exercise 10</b><br><b>Front Plank from Knees</b><br><b>Cue 1:</b> Push through floor with elbows, lifting shoulders.<br><b>Cue 2:</b> Keep hips in line with shoulders and knees, don't allow to sag.<br><b>Cue 3:</b> Be as tall as possible.<br><b>Sets:</b> 2<br><b>Reps/ Time:</b> 30s to 1 minute<br>                            |

NB. This session should be completed a minimum of 2 times a week and upto 4 times a week. It should be performed as a circuit with 2mins rest after all exercises have been completed once.
