# Supplementary material
Source: publisher figshare collection journal article supplement (https://sage.figshare.com/ndownloader/files/13078301)
Supplement: Supplementary file 2 [file 13078301]

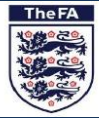

# ACL Warm-Up

## General Dynamic Warm-Up

Jog 20 metres  
Jog Backwards 20 metres  
Low Level Skip 20 metres  
High Skips 20 metres  
High Knees 20m out and back  
Side step 20 metres out and back.  
Carioca 20 metres out and back  
Cross step 15 metres out and back  
Rotating side step 20 metres

## Dynamic Flexibility

**Level 1** Static Spiderman Crawls 8 each leg  
**Level 2** Spiderman Crawls 8 repetitions  
Inchworm 6 repetitions  
**Level 1** Static Lunge 10 each leg  
**Level 2** Walking Lunges 20 repetitions  
Walking Quad Stretch 4 each leg (2 second hold)  
Lateral Lunge 10 each leg  
Hamstring 'starter' stretch 10 each leg  
**Level 1** Arabesque Double leg 10 repetitions  
**Level 2** Arabesque Split stance 8 each leg  
**Level 3** Arabesque Single leg 8 each leg  
Partner Assisted Eccentric Hamstrings 6 each leg  
Quickfire Hamstrings 20 repetitions

## Plyometrics and Landing Patterns

Double Leg calf jump 10 repetitions  
Calf Skips 10 metres  
**Level 1** Static Jumps into Sprints  
**Level 2** Countermovement Jumps into Sprints  
**Level 3** Tuck Jumps to sprint  
**Level 1** Step and hold, Controlled landing  
**Level 1** Step and hold Dynamic  
**Level 2+** Hop and Hold  
**Level 2+** Repeated Hops

## Speed/Agility

**Level 1** 5 metre to 3 step deceleration (building in speed) - repeat over 20m  
**Level 2** 10m sprint, stop, back pedal to 5m sprint to 15m repeating process to 20m  
**Level 3** 15m sprint, back pedal to 10m sprint to 20m and decelerate.  
Accelerate, Side Step, Accelerate  
Side Step out and back to sprint  
Diagonal cut
