# Supplementary material
Source: publisher figshare collection journal article supplement (https://sage.figshare.com/ndownloader/files/13078301)
Supplement: Supplementary file 3 [file 13078301]

Archive with 2 entries (2 files):
- ACL Warm-up.pdf
- Robustness Training Session Images.pdf
